# Supplementary material for: Recreational Exercising and Self-Reported Cardiometabolic Diseases in German People Living with HIV: A Cross-Sectional Study
Source: MDPI journal article supplement (doi:10.3390/ijerph182111579), 2021-11-04
Supplement: s1 [file s1]

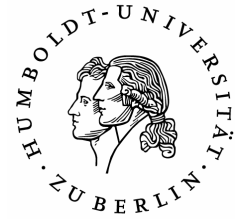

### Teilnehmerinformation: HIBES- Studie

Die derzeitige medikamentöse Therapie (Highly Active AntiRetroviral Treatment - HAART) gilt für die erfolgreiche Behandlung von HIV als unerlässlich. Folglich können Begleiterkrankungen auftreten.

Ist eine Begleiterkrankung diagnostiziert worden bedeutet das, neben der Einnahme der HAART-Medikamente, die Einnahme von wenigstens einem Medikament mehr.

Es bestehen bereits Bewegungs- und Sporttherapien für Herz- Kreislauf-, Stoffwechsel-, Tumor-, neurologische und systemische Gelenkerkrankungen, die eine Minderung der Medikamenteneinnahme, Erhöhung der Alltags-Leistungsfähigkeit und Erhöhung der Lebensqualität ermöglichen.

Theoretische Erkenntnisse und die angewandte Praxis weisen jedoch eine gewisse Diskrepanz auf. Einerseits kann ein HIV-Betroffener aufgrund mehrerer Erkrankungen viel zu viel Angst haben körperlich aktiv zu werden und nicht über das nötige Wissen hinsichtlich möglicher positive Effekte durch sportliche Betätigung verfügen. Andererseits kann es sein, dass der HIV- Betroffene um den positiven Effekt zwar weiß, in der Dosierung und Anwendung des Sports sowie der optimalen Sportart jedoch im Unklaren ist.

Aus diesem Grunde wird im Rahmen der **HIBES- Studie (HIV – Berlin – Sport- Studie)** beabsichtigt, mit Hilfe einer Befragung Grundlagen für eine Sporttherapie für HIV-positive Patienten mit HIV- und medikamentenbedingten Begleiterkrankungen zu schaffen. Auf Grundlage dieser Umfrage soll anschließend ein Praxisratgeber entwickelt werden.

Im Rahmen der Zusammenarbeit mit dem Kooperationspartner **Kompetenznetz HIV / AIDS** (gefördert durch das Bundesministerium für Bildung und Forschung (BMBF)) ist eine Ergänzung der **HIBES- Studie** mit medizinischen Daten des **Kompetenznetz HIV / AIDS** geplant. Diese Kooperation kann dazu beitragen, wichtige Fragen zu Auswirkungen von Sport und Bewegung in der HIV-Therapie zu beantworten. Sollten Sie Teilnehmer am **Kompetenznetz HIV / AIDS** sein, möchten wir Sie deshalb bitten, zu Beginn Ihre PID-Nummer (Pseudonym-Nummer) einzutragen. Sollte Sie diese nicht kennen, kann die PID bei Ihrem behandelnden Arzt erfragt werden.

Die **HIBES-Studie** wurde behördlichen Datenschutzbeauftragten der Humboldt- Universität zu Berlin geprüft und genehmigt. Die Sicherung der Anonymität wurde entsprechend der Richtlinien des Datenschutzes vom Datenschutzbeauftragten der Humboldt- Universität zu Berlin und vom Kompetenznetz HIV / AIDS für gegeben erklärt. Die **HIBES-Studie** wurde des Weiteren von der Ethikkommission der Charité - Universitätsmedizin Berlin - geprüft und genehmigt.

Die **HIBES- Studie** wird unterstützt durch das Kompetenznetz HIV / AIDS, die DAGNÄ, die HIV-Schwerpunktpraxen Deutschland, der Berliner Aidshilfe und deren Initiativen, Print- und Onlinemagazine und der European Gay and Lesbian Sport Federation (EGLSF).

Wir bitten Sie, sich deshalb an der anonymen Befragung zu beteiligen und andere Betroffene darauf hinzuweisen.

☐

Ich habe die Teilnehmerinformation gelesen.

# HUMBOLDT-UNIVERSITÄT ZU BERLIN

PHILOSOPHISCHE FAKULTÄT IV  
SPORTMEDIZIN



## Erläuterungen zum Datenschutz

**Ihre Teilnahme ist vollkommen freiwillig. Es entstehen Ihnen keinerlei Nachteile, wenn Sie nicht teilnehmen. Sie können die Teilnahme jederzeit abbrechen.**

Die nachfolgenden Fragen sind mit größtmöglicher Sorgfalt so ausgewählt worden, dass eine anonyme Erhebung und Verarbeitung der Daten gewährleistet ist.

Die Befragung beschränkt sich auf bestimmte medizinische und körperliche Merkmale. Es werden weder Name noch (E-Mail-)Adresse abgefragt, noch Ihre IP-Adresse gespeichert. Sollten Sie als Teilnehmer am Kompetenznetz HIV / AIDS Ihre PID eingetragen haben, werden Ihre medizinischen Daten ausschließlich anonymisiert erhoben. Die Datenerhebung erfolgt ausschließlich zur anonymen Auswertung im Rahmen einer Promotionsarbeit. Zugriff auf die erhobenen Daten haben nur Herr Philipp Zech, ferner die am Prüfverfahren beteiligten Betreuer, jedoch nur, soweit dies erforderlich ist. Erhobene Daten werden nicht an außenstehende Dritte bzw. Institutionen weitergegeben bzw. für weitere nicht-wissenschaftliche Zwecke verwendet. Vor Veröffentlichung der Auswertungsergebnisse wird nochmals geprüft, dass keine Rückschlüsse auf Personen möglich sind. Die anonymen Datensätze werden nach den Regeln der Deutschen Forschungsgemeinschaft (DFG) zur „Good Scientific Practice“ nach Beendigung des Forschungsvorhabens gelöscht.

Bei Fragen und Rückmeldungen zum Fragebogen können Sie sich per Mail an Herrn Philipp Zech wenden. Für eine anonyme Kontaktaufnahme können Sie z.B. eine eigens erstellte, unpersönliche E-Mail-Adresse nutzen.

Verantwortlich für die Datenerhebung ist

Herr Philipp Alexander Zech  
c/o Humboldt- Universität zu Berlin, Institut für Sportwissenschaften,  
Abteilung Sportmedizin  
Philippstr. 13, Haus 11,  
10115 Berlin

Email: [hivsport@gmx.de](mailto:hivsport@gmx.de)

☐

Ich habe die Erläuterungen zum Datenschutz gelesen und bin damit einverstanden.

## HIBES – Studie: Fragebogen

### 1. Allgemeines

1.1 Heutiges Datum: (Tag):\_\_\_\_; (Monat):\_\_\_\_; (Jahr):\_\_\_\_\_

1.2 Sollten Sie Teilnehmer an der Patienten-Kohorte des **Kompetenznetzes HIV / AIDS** sein und einige der dort dokumentierten klinischen Daten für unsere Studie zur Verfügung stellen wollen (siehe Patienten-Information), vermerken Sie bitte hier das Ihnen für jene Studie zugeteilte **Pseudonym (PID)**. Sollten Sie dieses nicht selbst kennen, fragen Sie bitte Ihren behandelnden Arzt.

PID: 

|  |  |  |  |  |  |  |  |
|--|--|--|--|--|--|--|--|
|  |  |  |  |  |  |  |  |
|--|--|--|--|--|--|--|--|

1.3 Ihr Wohnort ist in:

**Deutschland**

Berlin: ☐

Nicht Berlin: ☐

**Ausland**

Land: \_\_\_\_\_

1.4 Wie viele Einwohner hat ihr Wohnort?

bis 100.000: ☐

100.000 – 500.000: ☐

über 500.000: ☐

### 2. Persönliche Daten und sozioökonomischer Status:

2.1 Körperhöhe in cm: \_\_\_\_\_ cm

2.2 Körpergewicht in kg: \_\_\_\_\_ kg

2.3 Ihr Geschlecht:

männlich: ☐

weiblich: ☐

Andere: ☐

2.4 In welchem Jahr wurden Sie geboren:

19\_\_\_\_\_

2.5 Wie ist ihr Familienstand?

Ledig: ☐

Verheiratet: ☐

Geschieden: ☐

Verwitwet: ☐

2.6 Leben Sie in einer Partnerschaft?

Ja: ☐ Nein: ☐

2.7 In welchem Land wurden Sie geboren?

\_\_\_\_\_

In welchem Land wurde Ihre Mutter geboren?

\_\_\_\_\_

weiß nicht: ☐

In welchem Land wurde Ihr Vater geboren?

\_\_\_\_\_

weiß nicht: ☐

2.8 Mit der nächsten Frage möchten wir Sie zu Ihren Selbstbezeichnungen befragen.  
Wie beschreiben Sie selbst Ihre ethnische/ kulturelle/ nationale Identität und Zugehörigkeit?

|                                           |                          |                     |                          |
|-------------------------------------------|--------------------------|---------------------|--------------------------|
| Weißer / Weißer                           | <input type="checkbox"/> | Filipinisch         | <input type="checkbox"/> |
| Afrikanisch- amerikanisch                 | <input type="checkbox"/> | Thailändisch        | <input type="checkbox"/> |
| Afrikanisch                               | <input type="checkbox"/> | Arabisch            | <input type="checkbox"/> |
| Afrikanisch (Coloured)                    | <input type="checkbox"/> | Chinesisch          | <input type="checkbox"/> |
| Hispanisch / Latino                       | <input type="checkbox"/> | Japanisch           | <input type="checkbox"/> |
| Mexikanisch                               | <input type="checkbox"/> | Türkisch            | <input type="checkbox"/> |
| Mexikanisch-amerikanisch (chicano)        | <input type="checkbox"/> | Vietnamesisch       | <input type="checkbox"/> |
| Asiatisch-Indisch (Indisch- Amerikanisch) | <input type="checkbox"/> | Asiatisch (Colored) | <input type="checkbox"/> |
| Karibisch                                 | <input type="checkbox"/> | Indisch             | <input type="checkbox"/> |
| Karibisch (Colored)                       | <input type="checkbox"/> |                     |                          |

Sollten Ihre Selbstbezeichnungen nicht auf eine der oben genannten ethnischen/ kulturellen/ nationalen Identitäten und Zugehörigkeiten zutreffen, so kreuzen Sie bitte das nachfolgende Kästchen an und tragen Sie Ihre Selbstbezeichnungen ein. Benutzen Sie bitte gegebenenfalls auch Begriffe zur Selbstbezeichnung wie z.B. Schwarze/r, Person of Color, Nichtweiße/r, Weiße/r oder keine.

☐ \_\_\_\_\_

2.9 Wie viele Personen leben ständig in Ihrem Haushalt, Sie selbst mit eingeschlossen?

Ingesamt \_\_\_\_\_ Personen

Wie viele davon sind Kinder unter 18 Jahren?

Ingesamt \_\_\_\_\_ Personen

2.10 Was ist Ihr höchster Schulabschluss?  
(nicht gemeint sind Hochschulabschlüsse wie z.B. Studium etc...)

Hauptschule: ☐  
Abitur/ allgemeine Hochschulreife: ☐  
Anderer Schulabschluss: ☐  
Realschule/ Mittlere Reife: ☐  
Fachhochschulreife: ☐  
Kein Schulabschluss: ☐

Wie viele Jahre haben Sie die Schule besucht?

- < 8 Jahre: ☐  
8 - 9 Jahre: ☐  
10 Jahre: ☐  
11 – 13 Jahre: ☐

2.11 Welchen beruflichen Ausbildungsabschluss haben Sie?  
(Mehrfachnennungen sind möglich)

- Lehre: ☐  
Fachhochschule, Ingenieurschule: ☐  
Universität, Hochschule: ☐  
Andere Berufsausbildung: ☐  
Keine Berufsausbildung: ☐

2.12 Sind Sie zurzeit erwerbstätig?

- Ja, ganztägig: ☐  
mindestens halbtags: ☐  
weniger als halbtags: ☐  
  
Nein, Hausfrau/ Hausmann: ☐  
in Ausbildung/ Umschulung: ☐  
arbeitslos/ erwerbslos: ☐  
Erwerbs-, Berufsunfähigkeitsrente: ☐  
Altersrente: ☐  
Anderes: ☐

2.13 In welcher beruflichen Stellung sind Sie zurzeit bzw. waren Sie zuletzt beschäftigt?

- Arbeiter: ☐  
Angestellter: ☐  
Beamter: ☐  
Selbstständiger: ☐  
Sonstiges: ☐

2.14 Wie hoch ist das monatliche Nettoeinkommen Ihres Haushaltes insgesamt?  
(Nettoeinkommen: Summe aus Lohn/ Gehalt/ Einkommen usw. jeweils unter Abzug der Steuern und Sozialabgaben)

- Bis unter 500 Euro: ☐  
500 - 999 Euro: ☐  
1000 - 1499 Euro: ☐  
1500 - 1999 Euro: ☐  
2000 - 2499 Euro: ☐  
2500 - 2999 Euro: ☐  
3000 - 3499 Euro: ☐  
3500 Euro und mehr: ☐

2.15 Wie viele Stunden pro Woche arbeiten Sie?

\_\_\_\_\_ Stunden

### 3. HIV und Medikamenteneinnahme

#### 3.1 Ist bei Ihnen HIV diagnostiziert worden?

Ja: ☐                                      Nein: ☐

#### 3.2 Wann ist bei Ihnen HIV diagnostiziert worden?

Monat: \_\_\_\_\_ Jahr: \_\_\_\_\_

#### 3.3 Ist Ihnen Ihr **aktueller** CD4- T- Helferzellwert bekannt?

Ja: ☐                                      Nein: ☐

Wenn „Ja“, wie hoch ist er?

**Ungefähre Angabe:**

|           |                            |                          |
|-----------|----------------------------|--------------------------|
| 0 – 50    | CD4- Zellen/ $\mu\text{L}$ | <input type="checkbox"/> |
| 51 – 99   | CD4- Zellen/ $\mu\text{L}$ | <input type="checkbox"/> |
| 100 – 199 | CD4- Zellen/ $\mu\text{L}$ | <input type="checkbox"/> |
| 200 – 499 | CD4- Zellen/ $\mu\text{L}$ | <input type="checkbox"/> |
| > 500     | CD4- Zellen/ $\mu\text{L}$ | <input type="checkbox"/> |

Falls Sie Ihren exakten **aktuellen** CD4- Helferzellwert kennen, bitte notieren Sie ihn hier: \_\_\_\_\_

#### 3.4 Ist Ihnen Ihr **niedrigster** CD4- T- Helferzellwert bekannt? (Den niedrigsten CD4- Helferzellwert, den Sie jemals hatten)

Ja: ☐                                      Nein: ☐

Wenn „Ja“, wie hoch ist er?

**Ungefähre Angabe:**

|           |                            |                          |
|-----------|----------------------------|--------------------------|
| 0 – 50    | CD4- Zellen/ $\mu\text{L}$ | <input type="checkbox"/> |
| 51 – 99   | CD4- Zellen/ $\mu\text{L}$ | <input type="checkbox"/> |
| 100 – 199 | CD4- Zellen/ $\mu\text{L}$ | <input type="checkbox"/> |
| 200 – 499 | CD4- Zellen/ $\mu\text{L}$ | <input type="checkbox"/> |
| > 500     | CD4- Zellen/ $\mu\text{L}$ | <input type="checkbox"/> |

Falls Sie Ihren exakten **niedrigsten** CD4- Helferzellwert kennen, bitte notieren Sie ihn hier: \_\_\_\_\_

3.5 Ist Ihnen Ihre **aktuelle** Viruslast bekannt?

Ja: ☐

Nein: ☐

Wenn „Ja“, wie hoch ist sie?

**Ungefähre Angaben:**

|                                 |            |                          |
|---------------------------------|------------|--------------------------|
| <b>Unter der Nachweisgrenze</b> |            | <input type="checkbox"/> |
| 50 – 99                         | copies/ ml | <input type="checkbox"/> |
| 100 - 1.000                     | copies/ ml | <input type="checkbox"/> |
| 1.000 – 10.000                  | copies/ ml | <input type="checkbox"/> |
| 10.000 – 50.000                 | copies/ ml | <input type="checkbox"/> |
| 50.000 – 100.000                | copies/ ml | <input type="checkbox"/> |
| 1000.000 – 500.000              | copies/ ml | <input type="checkbox"/> |
| 500.000 – 1.000.000             | copies/ ml | <input type="checkbox"/> |
| > 1.000.000                     | copies/ ml | <input type="checkbox"/> |

Falls Sie Ihre exakte **aktuelle** Viruslast kennen, bitte notieren Sie sie hier:

\_\_\_\_\_

3.6 Nehmen Sie zurzeit gegen die HIV- Erkrankung anti-retrovirale HIV- Medikamente (ART/ HAART) ein?

Ja: ☐

Nein: ☐

Wenn „Nein“ bitte weiter mit Frage 3.7

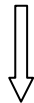

Wenn „Ja“, befindet sich auf der **nächsten** Seite (Extrablatt: - Medikamentenliste-) eine **Auflistung der Medikamente**. Bitte tragen Sie das Datum des Beginns (Monat / Jahr) der **aktuellen Medikamenteneinnahme** ein und kreuzen Sie die derzeit eingenommenen **Medikamente an (Kästchen)**. Danach machen Sie bitte mit Frage 3.7 weiter!

# -Medikamentenliste-

Bitte hier das Datum des Beginns der aktuellen Therapie eintragen:

**Aktuelle Therapie**

seit  
Monat / Jahr

\_\_\_\_ / \_\_\_\_

Bitte kreuzen Sie Ihre derzeit eingenommenen Medikamente an:

| Handelsname                                                                        | Wirkstoff                               | Abkürzung        |                          |
|------------------------------------------------------------------------------------|-----------------------------------------|------------------|--------------------------|
| <b>Kombinationspräparate</b>                                                       |                                         |                  |                          |
| Atripla                                                                            | Tenofovir, Emtricitabin und Efavirenz   | TDF, FTC und EFV | <input type="checkbox"/> |
| Combivir                                                                           | Lamivudin und Zidovudin                 | 3TC und AZT      | <input type="checkbox"/> |
| Kivexa                                                                             | Lamivudin und Abacavir                  | 3TC und ABC      | <input type="checkbox"/> |
| Epzicom                                                                            | Lamivudin und Abacavir                  | 3TC und ABC      | <input type="checkbox"/> |
| Trizivir                                                                           | Lamivudin, Abacavir und Zidovudin       | 3TC, ABC und AZT | <input type="checkbox"/> |
| Truvada                                                                            | Tenofovir und Emtricitabin              | TDF und FTC      | <input type="checkbox"/> |
| <b>Nukleosidanaloge/ Nukleotidanaloge Reverse-Transkriptase-Inhibitoren (NRTI)</b> |                                         |                  |                          |
| Emtriva                                                                            | Emtricitabin                            | FTC              | <input type="checkbox"/> |
| Epivir                                                                             | Lamivudin                               | 3TC              | <input type="checkbox"/> |
| Retrovir                                                                           | Zidovudin                               | AZT              | <input type="checkbox"/> |
| Videx                                                                              | Didanosin                               | ddl              | <input type="checkbox"/> |
| Viread                                                                             | Tenofovir                               | TDF              | <input type="checkbox"/> |
| Zerit                                                                              | Stavudin                                | d4T              | <input type="checkbox"/> |
| Ziagen                                                                             | Abacavir                                | ABC              | <input type="checkbox"/> |
| Hivid                                                                              | Zalcitabin                              | ddC              | <input type="checkbox"/> |
| <b>Nicht-Nukleosidale Reverse-Transkriptase-Inhibitoren (NNRTI)</b>                |                                         |                  |                          |
| Intelence                                                                          | Etravirin                               | ETV              | <input type="checkbox"/> |
| Sustiva                                                                            | Efavirenz                               | EFV              | <input type="checkbox"/> |
| Stocrin                                                                            | Efavirenz (amerikanisches Präparat)     | EFV              | <input type="checkbox"/> |
| Viramune                                                                           | Nevirapin                               | NVP              | <input type="checkbox"/> |
| Rescriptor                                                                         | Delavirdin                              | DVD              | <input type="checkbox"/> |
| <b>Protease-Inhibitoren (PI)</b>                                                   |                                         |                  |                          |
| Aptivus                                                                            | Tipranavir                              | TPV              | <input type="checkbox"/> |
| Crixivan                                                                           | Indinavir                               | IDV              | <input type="checkbox"/> |
| Invirase                                                                           | Saquinavir                              | SQV              | <input type="checkbox"/> |
| Kaletra                                                                            | Lopinavir und Ritonavir                 | LPV              | <input type="checkbox"/> |
| Prezista                                                                           | Darunavir                               | DRV              | <input type="checkbox"/> |
| Reyataz                                                                            | Atazanavir                              | ATV              | <input type="checkbox"/> |
| Telzir                                                                             | Fosamprenavir                           | FPV              | <input type="checkbox"/> |
| Lexiva                                                                             | Fosamprenavir (amerikanisches Präparat) | FPV              | <input type="checkbox"/> |
| Viracept                                                                           | Nelfinavir                              | NFV              | <input type="checkbox"/> |
| Fortovase                                                                          | Saquinavir                              | SQV              | <input type="checkbox"/> |
| Agenerase                                                                          | Ampranavir                              | APV              | <input type="checkbox"/> |
| <b>Entry-Inhibitoren</b>                                                           |                                         |                  |                          |
| Fuzeon                                                                             | Enfuvirtide                             | ENF              | <input type="checkbox"/> |
| Celsentri                                                                          | Maraviroc                               | MVC              | <input type="checkbox"/> |
| Selzentry                                                                          | Maraviroc (amerikanisches Präparat)     | MVC              | <input type="checkbox"/> |
| <b>Integrase-Inhibitoren</b>                                                       |                                         |                  |                          |
| Isentress                                                                          | Raltegravir                             | RAL              | <input type="checkbox"/> |

Sonstige



3.7 Haben Sie vorher schon andere anti-retrovirale HIV- Medikamente (ART / HAART) eingenommen?

Ja: ☐

Nein: ☐

3.8 Seit wann nehmen Sie überhaupt anti-retrovirale HIV- Medikamente ein (allererster Therapiebeginn)?

Monat: \_\_\_\_\_

Jahr: \_\_\_\_\_

3.9 Wie oft wurde die anti- retrovirale Therapie/HIV- Medikamente gewechselt?

\_\_\_\_\_mal

#### 4. Begleiterkrankungen

4.1 Haben Sie oder hatten Sie neben Ihrer HIV- Erkrankung eine weitere Erkrankung (siehe Liste der Begleiterkrankungen in Frage 4.2)?

*Dazu zählen z.B. Bluthochdruck, Lipodystrophie, Diabetes, Übergewicht, Pilzinfektionen, virale Infektionen, bakterielle Infektionen, Tumore (Krebs), psychische Erkrankungen, sexuell übertragbare Erkrankungen. (Also eigentlich alles außer Husten, Schnupfen und Halsweh)*

Ja: ☐

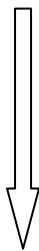

Aktuelle weitere Erkrankung: ☐

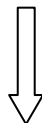

Weitere Erkrankung(en) in der Vergangenheit: ☐

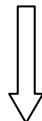

Bitte machen Sie weiter mit Frage 4.2.

Noch nie eine weitere Erkrankung: ☐

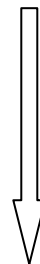

Wenn „Noch nie“,  
bitte machen Sie  
weiter mit Frage 4.4

4.2 In der folgenden Tabelle befindet sich eine Auflistung von Begleiterkrankungen. Bitte kreuzen Sie an, ob die Erkrankung VOR oder NACH der HIV- INFEKTION aufgetreten ist und welche dieser Begleiterkrankungen Sie **AKTUELL** haben.

**Mehrfachnennungen sind also möglich.** (Es kann beispielsweise sein, dass eine Erkrankung Vor und Nach der HIV-Infektion vorhanden war und **immer noch** aktuell ist. Oder: Es trat eine Erkrankung nach der HIV- Infektion auf, besteht aber **JETZT nicht** mehr.

Bitte **KREUZEN** Sie an!

| Begleiterkrankungen                                                    | Auftreten <u>vor</u><br>der HIV- Infektion | Auftreten <u>nach</u><br>der HIV- Infektion | Besteht noch<br><u>aktuell</u> |
|------------------------------------------------------------------------|--------------------------------------------|---------------------------------------------|--------------------------------|
| Fettstoffwechselstörung (Dyslipidämie)                                 |                                            |                                             |                                |
| Diabetes mellitus (Blutzuckererkrankung)                               |                                            |                                             |                                |
| Bluthochdruck (Arterielle Hypertonie)                                  |                                            |                                             |                                |
| Arteriosklerose (Arterienverkalkung)                                   |                                            |                                             |                                |
| Arterielle, periphere Verschlusskrankung (pAVK; Schaufensterkrankheit) |                                            |                                             |                                |
| Herzinsuffizienz (Herzschwäche)                                        |                                            |                                             |                                |
| Herzrhythmusstörung                                                    |                                            |                                             |                                |
| Koronare Herzkrankheit (Arteriosklerose der Herzkranzgefäße)           |                                            |                                             |                                |
| Herzinfarkt (Myokardinfarkt)                                           |                                            |                                             |                                |
| Schlaganfall (Apoplex, Insult)                                         |                                            |                                             |                                |
| Osteoporose (Knochenschwund, Minderung der Knochendichte)              |                                            |                                             |                                |
| Osteopenie (Vorstufe der Osteoporose)                                  |                                            |                                             |                                |
| Lipodystrophie (Fettverteilungsstörung)                                |                                            |                                             |                                |
| Übergewicht bzw. Adipositas                                            |                                            |                                             |                                |

| Pilzinfektionen (Candidosen)                                          |  |  |  |
|-----------------------------------------------------------------------|--|--|--|
| Pilzinfektion im Mundbereich (oropharyngeale Candidose)               |  |  |  |
| Soor (Pilzinfektion der Atemwege oder Speiseröhre)                    |  |  |  |
| Ösophagitis (Pilz- oder virale Infektion der Speiseröhre)             |  |  |  |
| Lungenentzündung (Pneumonie) 2 mal oder mehr innerhalb von 12 Monaten |  |  |  |
| Histoplasmose, chronisch (Pilzinfektion, zum Teil mit Gewebeschäden)  |  |  |  |
| Intestinale Isosporiasis                                              |  |  |  |
| Talfieber, Wüstenfieber (Kokzidiomycose extrapulmonal/ disseminiert)  |  |  |  |
| Kryptokokkose, extrapulmonal (in der Lunge)                           |  |  |  |
| Kryptokokkose, chronisch (Meningitis)                                 |  |  |  |
| PCP Lungenentzündung (Pneumocytose)                                   |  |  |  |

| Virale Infektionen                                                                                   |  |  |  |
|------------------------------------------------------------------------------------------------------|--|--|--|
| Gürtelrose (Herpes Zoster)                                                                           |  |  |  |
| CMV- Infektionen (Zytomegalievirus-Infektion; außer Leber, Milz, Lymphknoten)                        |  |  |  |
| CMV- Retinitis (Zytomegalievirus-Infektion der Netzhaut mit Einschränkung der Sehschärfe)            |  |  |  |
| Herpes mit chronischen Geschwüren (Herpes simplex)                                                   |  |  |  |
| Lungenentzündung (Pneumonie) 2 mal oder mehr innerhalb von 12 Monaten                                |  |  |  |
| Hirnhautentzündung (Meningitis)                                                                      |  |  |  |
| Progressive multifokale Leukenzephalopathie (fortschreitende Erkrankung des zentralen Nervensystems) |  |  |  |
| Orale Haarleukoplakie (weiß-streifige Veränderung der Zunge)                                         |  |  |  |

| Bakterielle Infektionen                                                                                                                                 |  |  |  |
|---------------------------------------------------------------------------------------------------------------------------------------------------------|--|--|--|
| Bazilläre Angiomatose (Geschwülste auf der Haut oder auch Organen)                                                                                      |  |  |  |
| Listeriose (Infektion mit Listerien)                                                                                                                    |  |  |  |
| Extrapulmonale Mykobakterien                                                                                                                            |  |  |  |
| Wiederkehrende Lungenentzündung (bakterielle rezidivierende Pneumonie über 1 Jahr)                                                                      |  |  |  |
| Salmonelleninfektionen (rezidivierende Salmonellen-Septikämie = wiederkehrende Gesamtkörperinfektion des Körpers mit Auftreten von Salmonellen im Blut) |  |  |  |
| Schwindsucht (Tuberkulose, pulmonal und extrapulmonal)                                                                                                  |  |  |  |
| MAC (Mycobacterium Avium Complex – Infektion)                                                                                                           |  |  |  |

Bitte **KREUZEN** Sie an!

| Begleiterkrankungen                                                                           | Auftreten <u>vor</u><br>der HIV- Infektion | Auftreten <u>nach</u><br>der HIV- Infektion | Auftreten<br><u>aktuell</u> |
|-----------------------------------------------------------------------------------------------|--------------------------------------------|---------------------------------------------|-----------------------------|
| <b>Tumore, Krebs</b>                                                                          |                                            |                                             |                             |
| Karzinoma in situ (Frühstadium eines epithelialen Tumors)                                     |                                            |                                             |                             |
| Kaposi- Sarkom                                                                                |                                            |                                             |                             |
| Zerebrales Burkitt-Lymphom                                                                    |                                            |                                             |                             |
| Burkitt-Lymphom                                                                               |                                            |                                             |                             |
| Non-Hodgkin-Lymphom (NHL)                                                                     |                                            |                                             |                             |
| Hodgkin- Lymphom (HL)                                                                         |                                            |                                             |                             |
| Analkarzinom                                                                                  |                                            |                                             |                             |
| <b>Andere Erkrankungen</b>                                                                    |                                            |                                             |                             |
| Thrombozytopenische Purpura (Kapilläre (fleckförmige) Einblutungen in Gehirn, Niere und Haut) |                                            |                                             |                             |
| Fieber/ Durchfall länger als ein Monat                                                        |                                            |                                             |                             |
| Periphere Neuropathie (Erkrankung des peripheren Nervensystems)                               |                                            |                                             |                             |
| HIV- bedingte Enzephalopathie (krankhafte Veränderung des Gehirns)                            |                                            |                                             |                             |
| Zerebrale Toxoplasmose (parasitäre Infektion des Gehirns mit Toxoplasmen)                     |                                            |                                             |                             |
| Wasting - Syndrom (ungewollter Gewichtsverlust)                                               |                                            |                                             |                             |
| Leishmaniose (parasitäre Infektion mit Leishmanien)                                           |                                            |                                             |                             |
| <b>Neurologische und psychiatrische Erkrankungen</b>                                          |                                            |                                             |                             |
| Polyneuropathie (Erkrankung des peripheren Nervensystems)                                     |                                            |                                             |                             |
| Depression                                                                                    |                                            |                                             |                             |
| Burnout- Syndrom                                                                              |                                            |                                             |                             |
| Schlafstörungen                                                                               |                                            |                                             |                             |
| Angststörungen                                                                                |                                            |                                             |                             |
| Psychosen                                                                                     |                                            |                                             |                             |
| Demenz                                                                                        |                                            |                                             |                             |
| <b>Erkrankungen der Frau (Gynäkologische Erkrankungen)</b>                                    |                                            |                                             |                             |
| Adnexitis (Entzündung des Eierstöcke und / oder der Eileiter)                                 |                                            |                                             |                             |
| Entzündung des kleinen Beckens                                                                |                                            |                                             |                             |
| Vaginale Candidose (Pilzinfektion der Vagina)                                                 |                                            |                                             |                             |
| Zervikale Dysplasien (dysplastische oder abnorme Zellveränderungen des Gebärmutterhalses)     |                                            |                                             |                             |
| Invasives Zervix- Karzinom (Gebärmutterhalskrebs)                                             |                                            |                                             |                             |
| <b>Sexuell übertragbare Krankheiten (Geschlechtskrankheiten/ STDs)</b>                        |                                            |                                             |                             |
| Chlamydien                                                                                    |                                            |                                             |                             |
| Feigwarzen                                                                                    |                                            |                                             |                             |
| Filzläuse                                                                                     |                                            |                                             |                             |
| Hepatitis B                                                                                   |                                            |                                             |                             |
| Hepatitis C                                                                                   |                                            |                                             |                             |
| Krätze                                                                                        |                                            |                                             |                             |
| Syphilis                                                                                      |                                            |                                             |                             |
| Trichomoniasis                                                                                |                                            |                                             |                             |
| Tripper (Gonorrhoe)                                                                           |                                            |                                             |                             |
| Herpes Genitalis                                                                              |                                            |                                             |                             |

4.3 Nehmen Sie zurzeit gegen Ihre aktuelle Begleiterkrankung zusätzlich Medikamente ein?  
(z.B. Bluthochdruckmedikamente wie Betablocker... etc.)

Ja: ☐

Nein: ☐

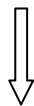

Wenn „Ja“, welche zusätzlichen Medikamente?

---

4.4 Zu welchem Grade wird das Auftreten folgender Begleiterkrankungen Ihrer Meinung nach durch die Einnahme antiretroviraler HIV- Medikamente verursacht oder begünstigt?

Kreuzen Sie an:

Auftreten der Begleiterkrankung aufgrund der antiretroviralen HIV- Medikamente  
sehr wahrscheinlich bis hin zu überhaupt nicht wahrscheinlich

|                                                                             | Auftreten<br>Durch HIV-<br>Medikamente<br><u>sehr wahrscheinlich</u> | Auftreten durch<br>HIV-<br>Medikamente<br><u>wahrscheinlich</u> | Es<br>könnte<br>beides<br>sein | Auftreten durch<br>HIV-<br>Medikamente<br><u>unwahrscheinlich</u> | Auftreten durch<br>HIV-<br>Medikamente<br><u>sehr<br/>unwahrscheinlich</u> |
|-----------------------------------------------------------------------------|----------------------------------------------------------------------|-----------------------------------------------------------------|--------------------------------|-------------------------------------------------------------------|----------------------------------------------------------------------------|
| Fettstoffwechselstörung (Dyslipidämie)                                      |                                                                      |                                                                 |                                |                                                                   |                                                                            |
| Diabetes mellitus (Blutzuckererkrankung)                                    |                                                                      |                                                                 |                                |                                                                   |                                                                            |
| Bluthochdruck (Arterielle Hypertonie)                                       |                                                                      |                                                                 |                                |                                                                   |                                                                            |
| Arteriosklerose (Arterienverkalkung)                                        |                                                                      |                                                                 |                                |                                                                   |                                                                            |
| Arterielle periphere<br>Verschlusskrankung<br>(pAVK; Schaufensterkrankheit) |                                                                      |                                                                 |                                |                                                                   |                                                                            |
| Herzinsuffizienz (Herzschwäche)                                             |                                                                      |                                                                 |                                |                                                                   |                                                                            |
| Herzrhythmusstörung                                                         |                                                                      |                                                                 |                                |                                                                   |                                                                            |
| Koronare Herzkrankheit<br>(Arteriosklerose der Herzkranzgefäße)             |                                                                      |                                                                 |                                |                                                                   |                                                                            |
| Herzinfarkt (Myokardinfarkt)                                                |                                                                      |                                                                 |                                |                                                                   |                                                                            |
| Schlaganfall (Apoplex, Insult)                                              |                                                                      |                                                                 |                                |                                                                   |                                                                            |
| Osteoporose<br>(Knochenschwund, Minderung der<br>Knochendichte)             |                                                                      |                                                                 |                                |                                                                   |                                                                            |
| Osteopenie (Vorstufe der Osteoporose)                                       |                                                                      |                                                                 |                                |                                                                   |                                                                            |
| Polyneuropathie<br>(Erkrankung des peripheren<br>Nervensystems)             |                                                                      |                                                                 |                                |                                                                   |                                                                            |
| Lipodystrophie (Fettverteilungsstörung)                                     |                                                                      |                                                                 |                                |                                                                   |                                                                            |
| Übergewicht bzw. Adipositas                                                 |                                                                      |                                                                 |                                |                                                                   |                                                                            |
| Depression                                                                  |                                                                      |                                                                 |                                |                                                                   |                                                                            |
| Burn-out                                                                    |                                                                      |                                                                 |                                |                                                                   |                                                                            |
| Schlafstörungen                                                             |                                                                      |                                                                 |                                |                                                                   |                                                                            |
| Angst                                                                       |                                                                      |                                                                 |                                |                                                                   |                                                                            |
| Psychosen                                                                   |                                                                      |                                                                 |                                |                                                                   |                                                                            |
| Demenz                                                                      |                                                                      |                                                                 |                                |                                                                   |                                                                            |

## 5. Sportverhalten von HIV- positiven Patienten

### 5.1 Treiben Sie aktuell Sport oder haben Sie Sport betrieben?

Ja: ☐  
↓

Nein: ☐  
Wenn „Nein“, bitte weiter mit Frage  
5.4

### 5.2 Nachfolgend befindet sich eine Tabelle „Sport früher und aktuell“. Dort tragen Sie bitte Ihre betriebene Sportart, den Zeitraum, die Häufigkeit pro Woche (Trainingseinheiten) und die Trainingsstunden pro Woche ein. Die Spalte „Regelmäßigkeit“ wird lediglich mit einem „Ja“ oder „Nein“ beantwortet. „Regelmäßig“ bedeutet, wenn mindestens einmal pro Woche Sport über längeren Zeitraum (1 Jahr) betrieben wurde.

Mehrfachnennungen sind möglich!

**Sport aktuell:** Bitte tragen Sie Ihre **aktuelle** sportliche Aktivität ein:

| Sportart aktuell | Zeitraum<br>(bitte Jahreszahlen angeben) |     | Häufigkeit<br>(Trainingseinheiten)<br>pro Woche | Trainingsstunden<br>pro Woche | Regelmäßig?<br>Ja / Nein |
|------------------|------------------------------------------|-----|-------------------------------------------------|-------------------------------|--------------------------|
|                  | von                                      | bis |                                                 |                               |                          |
|                  |                                          |     |                                                 |                               |                          |
|                  |                                          |     |                                                 |                               |                          |
|                  |                                          |     |                                                 |                               |                          |
|                  |                                          |     |                                                 |                               |                          |
|                  |                                          |     |                                                 |                               |                          |

**Sport früher:** Bitte tragen Sie Ihre **früheren** sportlichen Aktivitäten ein:

| Sportart früher | Zeitraum<br>(bitte Jahreszahlen angeben) |     | Häufigkeit<br>(Trainingseinheiten)<br>pro Woche | Trainingsstunden<br>pro Woche | Regelmäßig?<br>Ja / Nein |
|-----------------|------------------------------------------|-----|-------------------------------------------------|-------------------------------|--------------------------|
|                 | von                                      | bis |                                                 |                               |                          |
|                 |                                          |     |                                                 |                               |                          |
|                 |                                          |     |                                                 |                               |                          |
|                 |                                          |     |                                                 |                               |                          |
|                 |                                          |     |                                                 |                               |                          |
|                 |                                          |     |                                                 |                               |                          |
|                 |                                          |     |                                                 |                               |                          |
|                 |                                          |     |                                                 |                               |                          |
|                 |                                          |     |                                                 |                               |                          |
|                 |                                          |     |                                                 |                               |                          |
|                 |                                          |     |                                                 |                               |                          |
|                 |                                          |     |                                                 |                               |                          |
|                 |                                          |     |                                                 |                               |                          |
|                 |                                          |     |                                                 |                               |                          |

### 5.3 Hat sich ihr Sportverhalten nach der HIV- Infektion verändert?

Ja: ☐

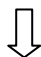

Nein: ☐

Wenn „Nein“, bitte weiter mit Frage 5.4

Wenn „Ja“, in wiefern? (Mehrfachantworten sind möglich!)

- „Seit Bekanntwerden der HIV- Infektion treibe ich mehr Sport als vorher“ ☐
- „Seit Bekanntwerden der HIV- Infektion treibe ich weniger Sport als vorher“ ☐
- „Seit Bekanntwerden der HIV-Infektion treibe ich genauso viel Sport wie vorher“ ☐
- „Nach Bekanntwerden der HIV-Infektion habe ich mit Sport aufgehört“ ☐
- „Nach Bekanntwerden der HIV-Infektion habe ich mit Sport begonnen“ ☐
- „Nach Bekanntwerden der HIV-Infektion treibe ich einen anderen Sport“ ☐

### 5.4 Wie schätzen Sie folgende Aussagen ein?

Bitte **kreuzen** Sie von Trifft voll zu bis Trifft überhaupt nicht zu an!

| Bitte Ankreuzen!                                                                                                                             | Trifft voll zu | Trifft teilweise zu | Weder - noch | Trifft weniger zu | Trifft überhaupt nicht zu |
|----------------------------------------------------------------------------------------------------------------------------------------------|----------------|---------------------|--------------|-------------------|---------------------------|
| „Ich habe Spaß am Sport“                                                                                                                     |                |                     |              |                   |                           |
| „Sport laugt mich aus“                                                                                                                       |                |                     |              |                   |                           |
| „Ich habe keine Zeit für Sport“                                                                                                              |                |                     |              |                   |                           |
| „Ich habe Kenntnis über eine gesundheitliche Wirkung von Sport auf HIV“                                                                      |                |                     |              |                   |                           |
| „Ich habe Hemmungen aufgrund meiner HIV-Infektion Sport zu betreiben“                                                                        |                |                     |              |                   |                           |
| „Durch Sport verbessere ich mein Aussehen“                                                                                                   |                |                     |              |                   |                           |
| „Sport schadet meiner Gesundheit“                                                                                                            |                |                     |              |                   |                           |
| „Durch Sport habe ich soziale Kontakte“                                                                                                      |                |                     |              |                   |                           |
| „Eine auf die HIV- Erkrankung abgestimmte Sporttherapie erachte ich als sinnvoll“                                                            |                |                     |              |                   |                           |
| „Unter fachkompetenter HIV-zielgerichteter sportlicher Betreuung würde ich mehr Sport treiben“                                               |                |                     |              |                   |                           |
| „Vor Sport habe ich Angst“                                                                                                                   |                |                     |              |                   |                           |
| „In Fragen zu Sport bei HIV kenne ich mich aus“                                                                                              |                |                     |              |                   |                           |
| „Wegen gesundheitlicher Probleme treibe ich weniger oder kein Sport“                                                                         |                |                     |              |                   |                           |
| „Ich treibe genauso viel Sport wie schon immer“                                                                                              |                |                     |              |                   |                           |
| „Ich treibe weniger Sport als früher“                                                                                                        |                |                     |              |                   |                           |
| „Sport fördert meine Gesundheit“                                                                                                             |                |                     |              |                   |                           |
| „Sport entspannt mich“                                                                                                                       |                |                     |              |                   |                           |
| „Ich habe Kenntnis über die positive Wirkung von Sport auf eine entsprechende Begleiterkrankung“                                             |                |                     |              |                   |                           |
| „Eine auf die Begleiterkrankung abgestimmte Sporttherapie erachte ich als sinnvoll“                                                          |                |                     |              |                   |                           |
| „Unter fachkompetenter, zielgerichteter sportlicher Betreuung und Berücksichtigung meiner Begleiterkrankung(en) würde ich mehr Sport machen“ |                |                     |              |                   |                           |
| „Ich habe Hemmungen aufgrund meiner Begleiterkrankung(en) Sport zu betreiben“                                                                |                |                     |              |                   |                           |
| <b>Die nächsten beiden Aussagen bitte nur ausfüllen, wenn eine Begleiterkrankung besteht:</b>                                                |                |                     |              |                   |                           |
| „Unter fachkompetenter, zielgerichteter sportlicher Betreuung und Berücksichtigung meiner Begleiterkrankung(en) würde ich mehr Sport machen“ |                |                     |              |                   |                           |
| „Ich habe Hemmungen aufgrund meiner Begleiterkrankung(en) Sport zu betreiben“                                                                |                |                     |              |                   |                           |

**Bitte beantworten Sie die folgenden Fragen, indem Sie das entsprechende Kästchen ankreuzen.**

1. Wie würden Sie Ihren Gesundheitszustand im Allgemeinen beschreiben?

(Bitte kreuzen Sie nur ein Kästchen an)

Ausgezeichnet..... 1 ☐

Sehr gut..... 2 ☐

Gut ..... 3 ☐

Weniger gut..... 4 ☐

Schlecht ..... 5 ☐

2. Wie stark waren Ihre Schmerzen in den **letzten 4 Wochen**?

(Bitte kreuzen Sie nur ein Kästchen an)

Ich hatte keine Schmerzen ..... 1 ☐

Sehr leicht ..... 2 ☐

Leicht..... 3 ☐

Mittelmäßig..... 4 ☐

Stark..... 5 ☐

Sehr stark..... 6 ☐

3. Inwieweit haben **die Schmerzen** Sie in den **vergangenen 4 Wochen** bei der Ausübung Ihrer Alltagstätigkeiten zu Hause und im Beruf behindert?

(Bitte kreuzen Sie nur ein Kästchen an)

Überhaupt nicht..... 1 ☐

Ein bißchen ..... 2 ☐

Mittelmäßig..... 3 ☐

Ziemlich..... 4 ☐

Sehr..... 5 ☐

4. Im Folgenden sind einige Tätigkeiten beschrieben, die Sie vielleicht an einem normalen Tag ausüben. **Sind Sie durch Ihren derzeitigen Gesundheitszustand bei diesen Tätigkeiten eingeschränkt?** Wenn ja, wie stark?

(Bitte kreuzen Sie in jeder Zeile nur ein Kästchen an)

|                                                                                                               | Ja,<br>stark<br>eingeschränkt | Ja,<br>etwas<br>eingeschränkt | Nein,<br>überhaupt<br>nicht<br>eingeschränkt |
|---------------------------------------------------------------------------------------------------------------|-------------------------------|-------------------------------|----------------------------------------------|
|                                                                                                               | 1                             | 2                             | 3                                            |
| a. <b>Anstrengende Tätigkeiten</b> wie schwere Gegenstände heben, schnell laufen, anstrengenden Sport treiben | <input type="checkbox"/>      | <input type="checkbox"/>      | <input type="checkbox"/>                     |
| b. <b>Mittelschwere Tätigkeiten</b> , wie einen Tisch verschieben, Einkaufstaschen tragen oder kegeln         | <input type="checkbox"/>      | <input type="checkbox"/>      | <input type="checkbox"/>                     |
| c. Bergan gehen oder ein paar Treppenabsätze steigen                                                          | <input type="checkbox"/>      | <input type="checkbox"/>      | <input type="checkbox"/>                     |
| d. Sich beugen, etwas vom Boden aufheben, bücken                                                              | <input type="checkbox"/>      | <input type="checkbox"/>      | <input type="checkbox"/>                     |
| e. Von einer Straßenecke zur nächsten zu Fuß gehen                                                            | <input type="checkbox"/>      | <input type="checkbox"/>      | <input type="checkbox"/>                     |
| f. Essen, sich anziehen, sich baden oder die Toilette benutzen                                                | <input type="checkbox"/>      | <input type="checkbox"/>      | <input type="checkbox"/>                     |

5. Hindert Sie Ihr Gesundheitszustand daran, Ihren Beruf auszuüben, Arbeiten zu Hause zu verrichten oder einer Ausbildung nachzugehen?

(Bitte kreuzen Sie nur ein Kästchen an)

Ja ..... 1 ☐

Nein..... 2 ☐

6. Waren Sie wegen Ihres Gesundheitszustandes gänzlich unfähig, bestimmte Arten von Arbeiten im Beruf, Haushalt oder Ausbildung zu verrichten?

(Bitte kreuzen Sie nur ein Kästchen an)

Ja ..... 1 ☐

Nein..... 2 ☐



Bitte kreuzen Sie bei jeder Frage die Antwort an, die Ihrem Befinden in den letzten 4 Wochen am ehesten entspricht.

(Bitte kreuzen Sie in jeder Zeile nur ein Kästchen an)

|                                                                                                                                                         | Immer                    | Meistens                 | Ziemlich<br>oft          | Manchmal                 | Selten                   | Nie                      |
|---------------------------------------------------------------------------------------------------------------------------------------------------------|--------------------------|--------------------------|--------------------------|--------------------------|--------------------------|--------------------------|
|                                                                                                                                                         | 1                        | 2                        | 3                        | 4                        | 5                        | 6                        |
| 7. Wie oft in den letzten 4 Wochen hat Ihr Gesundheitszustand Ihre sozialen Kontakte eingeschränkt (wie Besuche bei Freunden oder Familienangehörigen)? | <input type="checkbox"/> |
| 8. Wie oft in den letzten 4 Wochen:                                                                                                                     |                          |                          |                          |                          |                          |                          |
| a. Waren Sie sehr nervös?                                                                                                                               | <input type="checkbox"/> |
| b. Waren Sie ruhig und gelassen?                                                                                                                        | <input type="checkbox"/> |
| c. Waren Sie entmutigt und traurig?                                                                                                                     | <input type="checkbox"/> |
| d. Waren Sie glücklich?                                                                                                                                 | <input type="checkbox"/> |
| e. Waren Sie so niedergeschlagen, daß Sie nichts aufheitern konnte?                                                                                     | <input type="checkbox"/> |

(Bitte kreuzen Sie in jeder Zeile nur ein Kästchen an)

|                                                                        | Immer                    | Meistens                 | Ziemlich<br>oft          | Manchmal                 | Selten                   | Nie                      |
|------------------------------------------------------------------------|--------------------------|--------------------------|--------------------------|--------------------------|--------------------------|--------------------------|
|                                                                        | 1                        | 2                        | 3                        | 4                        | 5                        | 6                        |
| <b>9. Wie oft in den letzten 4 Wochen:</b>                             |                          |                          |                          |                          |                          |                          |
| a. Waren Sie voller Schwung?                                           | <input type="checkbox"/> |
| b. Fühlten Sie sich erschöpft?                                         | <input type="checkbox"/> |
| c. Fühlten Sie sich müde?                                              | <input type="checkbox"/> |
| d. Hatten Sie genug Energie, die Dinge zu tun, die Sie tun wollten?    | <input type="checkbox"/> |
| e. Fühlten Sie sich durch Ihre gesundheitlichen Probleme belastet?     | <input type="checkbox"/> |
| f. Waren Sie wegen Ihrer gesundheitlichen Probleme entmutigt?          | <input type="checkbox"/> |
| g. Fühlten Sie sich wegen Ihrer gesundheitlichen Probleme verzweifelt? | <input type="checkbox"/> |
| h. Hatten Sie wegen Ihres Gesundheitszustands Angst?                   | <input type="checkbox"/> |

(Bitte kreuzen Sie in jeder Zeile nur ein Kästchen an)

|                                                                                                                                              | Immer                    | Meistens                 | Ziemlich<br>oft          | Manchmal                 | Selten                   | Nie                      |
|----------------------------------------------------------------------------------------------------------------------------------------------|--------------------------|--------------------------|--------------------------|--------------------------|--------------------------|--------------------------|
|                                                                                                                                              | 1                        | 2                        | 3                        | 4                        | 5                        | 6                        |
| <b>10. Wie oft in den letzten 4 Wochen</b>                                                                                                   |                          |                          |                          |                          |                          |                          |
| a. Hatten Sie Schwierigkeiten beim Nachdenken und beim Lösen von Problemen, z.B. beim Planen, Entscheiden, Lernen neuer Dinge?               | <input type="checkbox"/> |
| b. Haben Sie Dinge vergessen, die vor kurzem passiert sind, beispielsweise den Ort, an dem Sie etwas abgelegt hatten, oder eine Verabredung? | <input type="checkbox"/> |
| c. Hatten Sie Schwierigkeiten, Ihre Aufmerksamkeit über einen längeren Zeitraum auf eine Tätigkeit zu halten?                                | <input type="checkbox"/> |
| d. Hatten Sie Schwierigkeiten, Tätigkeiten auszuführen, die Konzentration und Nachdenken erfordern?                                          | <input type="checkbox"/> |

(Bitte kreuzen Sie in jeder Zeile nur ein Kästchen an)

|                                                                                                     | Trifft ganz<br>zu        | Trifft<br>weitgehend<br>zu | Weiß<br>nicht            | Trifft<br>weitgehend<br>nicht zu | Trifft<br>überhaupt<br>nicht zu |
|-----------------------------------------------------------------------------------------------------|--------------------------|----------------------------|--------------------------|----------------------------------|---------------------------------|
|                                                                                                     | 1                        | 2                          | 3                        | 4                                | 5                               |
| <b>11. Bitte kreuzen Sie für jede Aussage an, wie zutreffend oder unzutreffend sie für Sie ist.</b> |                          |                            |                          |                                  |                                 |
| a. Ich bin etwas kränklich.                                                                         | <input type="checkbox"/> | <input type="checkbox"/>   | <input type="checkbox"/> | <input type="checkbox"/>         | <input type="checkbox"/>        |
| b. Ich bin genauso gesund wie alle anderen, die ich kenne.                                          | <input type="checkbox"/> | <input type="checkbox"/>   | <input type="checkbox"/> | <input type="checkbox"/>         | <input type="checkbox"/>        |
| c. Ich erfreue mich ausgezeichneter Gesundheit.                                                     | <input type="checkbox"/> | <input type="checkbox"/>   | <input type="checkbox"/> | <input type="checkbox"/>         | <input type="checkbox"/>        |
| d. Ich habe mich in letzter Zeit schlecht gefühlt.                                                  | <input type="checkbox"/> | <input type="checkbox"/>   | <input type="checkbox"/> | <input type="checkbox"/>         | <input type="checkbox"/>        |

12. Wie war Ihre Lebensqualität, d.h. wie ging es Ihnen in den **letzten 4 Wochen**?

(Bitte kreuzen Sie nur ein Kästchen an)

Sehr gut, könnte nicht besser sein..... 1 ☐

Ziemlich gut..... 2 ☐

Mal gut, mal schlecht ..... 3 ☐

Ziemlich schlecht ..... 4 ☐

Sehr schlecht, könnte nicht schlechter sein..... 5 ☐

13. Im Vergleich zu **vor 4 Wochen**, wie würden Sie Ihren derzeitigen Gesundheitszustand und Ihre seelische Verfassung beschreiben?

(Bitte kreuzen Sie nur ein Kästchen an)

Derzeit viel besser..... 1 ☐

Derzeit etwas besser..... 2 ☐

Etwa gleich..... 3 ☐

Derzeit etwas schlechter ..... 4 ☐

Derzeit viel schlechter ..... 5 ☐

**14. Bitte kreuzen Sie unter jeder Überschrift DAS Kästchen an, das Ihre Gesundheit HEUTE am besten beschreibt.**

**BEWEGLICHKEIT / MOBILITÄT**

- |                                         |                          |
|-----------------------------------------|--------------------------|
| Ich habe keine Probleme, herumzugehen   | <input type="checkbox"/> |
| Ich habe leichte Probleme, herumzugehen | <input type="checkbox"/> |
| Ich habe mäßige Probleme, herumzugehen  | <input type="checkbox"/> |
| Ich habe große Probleme, herumzugehen   | <input type="checkbox"/> |
| Ich bin nicht in der Lage, herumzugehen | <input type="checkbox"/> |

**FÜR SICH SELBST SORGEN**

- |                                                                   |                          |
|-------------------------------------------------------------------|--------------------------|
| Ich habe keine Probleme, mich selbst zu waschen oder anzuziehen   | <input type="checkbox"/> |
| Ich habe leichte Probleme, mich selbst zu waschen oder anzuziehen | <input type="checkbox"/> |
| Ich habe mäßige Probleme, mich selbst zu waschen oder anzuziehen  | <input type="checkbox"/> |
| Ich habe große Probleme, mich selbst zu waschen oder anzuziehen   | <input type="checkbox"/> |
| Ich bin nicht in der Lage, mich selbst zu waschen oder anzuziehen | <input type="checkbox"/> |

**ALLTÄGLICHE TÄTIGKEITEN (z. B. Arbeit, Studium, Hausarbeit, Familien- oder Freizeitaktivitäten)**

- |                                                                        |                          |
|------------------------------------------------------------------------|--------------------------|
| Ich habe keine Probleme, meinen alltäglichen Tätigkeiten nachzugehen   | <input type="checkbox"/> |
| Ich habe leichte Probleme, meinen alltäglichen Tätigkeiten nachzugehen | <input type="checkbox"/> |
| Ich habe mäßige Probleme, meinen alltäglichen Tätigkeiten nachzugehen  | <input type="checkbox"/> |
| Ich habe große Probleme, meinen alltäglichen Tätigkeiten nachzugehen   | <input type="checkbox"/> |
| Ich bin nicht in der Lage, meinen alltäglichen Tätigkeiten nachzugehen | <input type="checkbox"/> |

**SCHMERZEN / KÖRPERLICHE BESCHWERDEN**

- |                                             |                          |
|---------------------------------------------|--------------------------|
| Ich habe keine Schmerzen oder Beschwerden   | <input type="checkbox"/> |
| Ich habe leichte Schmerzen oder Beschwerden | <input type="checkbox"/> |
| Ich habe mäßige Schmerzen oder Beschwerden  | <input type="checkbox"/> |
| Ich habe starke Schmerzen oder Beschwerden  | <input type="checkbox"/> |
| Ich habe extreme Schmerzen oder Beschwerden | <input type="checkbox"/> |

**ANGST / NIEDERGESCHLAGENHEIT**

- |                                             |                          |
|---------------------------------------------|--------------------------|
| Ich bin nicht ängstlich oder deprimiert     | <input type="checkbox"/> |
| Ich bin ein wenig ängstlich oder deprimiert | <input type="checkbox"/> |
| Ich bin mäßig ängstlich oder deprimiert     | <input type="checkbox"/> |
| Ich bin sehr ängstlich oder deprimiert      | <input type="checkbox"/> |
| Ich bin extrem ängstlich oder deprimiert    | <input type="checkbox"/> |

**15. Wir wollen herausfinden, wie gut oder schlecht Ihre Gesundheit HEUTE ist.**

- Diese Skala ist mit Zahlen von 0 bis 100 versehen.
- 100 ist die beste Gesundheit, die Sie sich vorstellen können.
- 0 (Null) ist die schlechteste Gesundheit, die Sie sich vorstellen können.
- Bitte kreuzen Sie den Punkt auf der Skala an, der Ihre Gesundheit HEUTE am besten beschreibt.
- Jetzt tragen Sie bitte die Zahl, die Sie auf der Skala angekreuzt haben, in das Kästchen unten ein.

IHRE GESUNDHEIT HEUTE =

**VIELEN DANK**

Beste Gesundheit, die Sie  
sich vorstellen können

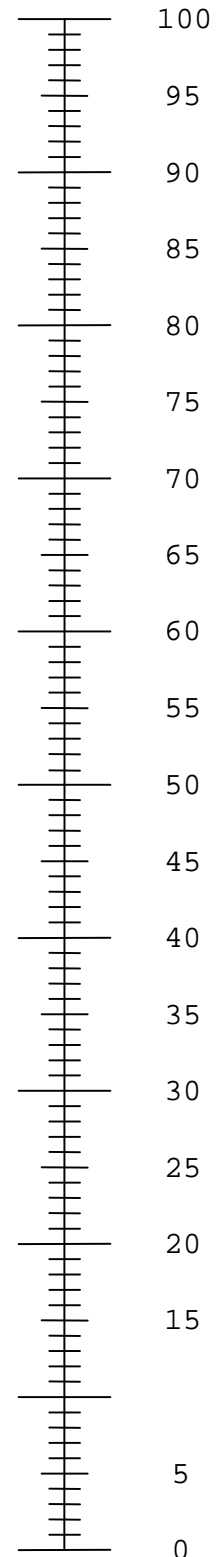

Schlechteste Gesundheit,  
die Sie sich vorstellen
